# Supplementary material for: Critical review of fluorescence and absorbance measurements as surrogates for the molecular weight and aromaticity of dissolved organic matter
Source: Royal Society of Chemistry journal article supplement (doi:10.1039/d4em00183d), 2024-01-01
Supplement: d4em00183d2.xlsx [file d4em00183d2.xlsx]

## Sheet: Belin 1993
Belin, C., Quellec, C., Lamotte, M., Ewald, M. & Simon, Ph. Characterization by fluorescence of the dissolved organic matter in natural water. application to fractions obtained by tangential ultrafiltration and XAD resin isolation. Environ Technol 14, 1131–1144 (1993).
Water 1
Membrane	Nominal MW (Da)	AQY
None	Bulk	0.019
R5	>1500	0.012
R2	500-1500	0.024
R05	200-500	0.034
F05	<200	0.049
Water2
Membrane	Nominal MW (Da)	AQY	Peak Emission (nm)
None	Bulk	0.017	–
R5	>1500	0.011	441
R2	500-1500	0.016	436
R05	200-500	0.029	426
F05	<200	0.047	407
Water2
Extract	Nominal MW (Da)	Peak Emission (nm)
HA	0.008	456
FA	0.018	437
HyA	0.027	426
XAD4_F		414
QY at Ex = 313 nm

## Sheet: Buffle 1978
Buffle, J., Deladoey, P. & Haerdi, W. The use of ultrafiltration for the separation and fractionation of organic ligands in fresh waters. Anal. Chim. Acta 101, 339–357 (1978).
	Fraction of OM			F/TOC (350/450)
Sample	0.2 um to 10000	210-10000	<210	<0.2 um	210-10000	<210
10	3	81.1	12	1.66	1.64	0.88
11	1	70.2	15	1.23	1.53	0.76
21	6.7	71.7	13.7	1.16	1.44	0.9
22	0	67.5	20.8	1.61	2.5	1.34
24	20.1	28.2	20.7	0.96	1.29	0.7
41	78.2	17.2	4.6	0.41	0.57	0.22
50a	10.9	75	14.1	1	1.17	0.61
S0	7.7	57	23	0.43	0.53	0.34
S1	18.8	56.5	9.9	0.55	0.54	0.43
S2	9.5	29.5	20.9	0.61	0.56	0.51
S3	17.2	46	18.2	0.8	0.56	0.49
F1	80	15	5	0.28	NaN	NaN
F2	55	3	NaN	0.31	NaN	NaN
F3	70	10	5	0.16	NaN	NaN
F4	75	10	NaN	0.26	NaN	NaN

## Sheet: Chin et al. 1994
Chin et al., Molecular Weight, Polydispersity, and Spectroscopic Properties of Aquatic Humic Substances, Environmental Science & Technology, 1994, 28, 1853–1858
Sample	Mn	Mw	Mn by VPO	E280 (L/molC/cm)	Aromaticity (%)	E4/E6
Missouri River FA	839	1460	640	247	20.4	13.9
Yakima River FA	800	1560	650	323	24.2	9.47
Ohio River FA	705	1330	618	274	24.3	17.2
Minnesota groundwater FA	639	1000	650	122	12.6	3.53
Suwannee River FA	1360	2310	829	389	24.8	20.7
Coal Creek FA	1180	2230	743	401	27.4	20.7
Lake Fryxell	713	1080	490	150	13	NaN
Lake Michigan porewater (3.5 cm)	545	845	–	59.6	NaN	NaN
Lake Michigan porewater (6.5 cm)	765	1120	–	113	NaN	NaN
Lake Michigan porewater (8.5 cm)	736	1100	–	133	NaN	NaN
Aldrich HA	1630	4100	–	919	NaN	7.59
Suwannee River water	1330	2190	–	509	NaN	NaN

## Sheet: DeHaan 1972
de Haan, H. Molecule-size distribution of soluble humic compounds from different natural waters. Freshwater Biol 2, 235–241 (1972).
Table 1
%I	%II	%III	E2:E3
72	17	11	7.43
76	14	10	5.78
77	15	8	5.45
78	14	8	5.35
72	17	11	6.81
72	17	11	6.98
57	25	18	7.44
48	27	25	7.68
%Table 2
%I	%II	%III	E2:E3
53	33	14	6.42
58	28	14	6.65
53	31	16	6.84
64	19	17	7.05
62	19	19	6.75
61	18	21	7.17
49	27	24	7.71

## Sheet: DeHaan 1987
De Haan H, De Boer T (1987) Applicability of light absorbance and fluorescence as measures of concentration and molecular size of dissolved organic carbon in humic Lake Tjeukemeer. Water Research, 21(6):731–734. https://doi.org/10.1016/0043-1354(87)90086-8
Size class (nm)	DOC (mg/L)	F/E250	E2/E3	F/C
35	1.4	25	3.5	1.4
20	1.9	209	5.3	14.6
10	3.9	315	6.4	13.2
5	3.5	393	6.6	15.6
0	8.6	472	6.5	10.4

## Sheet: Helms 2008
Helms, J. R. et al. Absorption spectral slopes and slope ratios as indicators of molecular weight, source, and photobleaching of chromophoric dissolved organic matter. Limnol Oceanogr 53, 955–969 (2008).
Figure 5 data extracted digitally from plot
Molecular Weight (Da)	S275-295 (nm-1)
1092.5	0.0132667
1484.64	0.0128
1994.22	0.0114444
2077.33	0.011
2405.69	0.0102222
2904.43	0.00953333
4052.94	0.009
Molecular weight (Da)	S350-400 (nm-1)
1092.5	0.0185761
1484.64	0.0180217
1994.22	0.0162283
2077.33	0.0153152
2405.69	0.0145326
2904.43	0.0138152
4052.94	0.0127065
Molecular Weight (Da)	SR
1071.67	0.716642
1401.08	0.713149
2019.57	0.706022
2092.64	0.720908
2652.58	0.706247
3766.57	0.691964
8344.79	0.711763

## Sheet: Huguet 2010
Huguet, A. et al. New insights into the size distribution of fluorescent dissolved organic matter in estuarine waters. Organic Geochemistry {41}, {595-610} (2010).
Table 3 Fluorescence intensities (I) of ﬂuorophores a0 , a, b and c multiplied by the volume of each UF in the UF fractions of samples G’1s, G’2s, G’3s and G’4s (Gironde Estuary, Optic G3, September 2006). HIX, BIX and f450/f500 values are also reported. Fluorescence intensities are expressed in Raman units (nm-1). The analytical uncertainty associated with both measurement of ﬂuorescence intensi…
Sample	Fraction	Ia0	Ic	Ib	Ia	HIX	BIX	f450/f500
Gironde Estuary sample G1s	Bulk sample	0.608	0.155	0.276	0.236	11.2	0.62	1.17
Gironde Estuary sample G1s	3 kDa retentate	0.128	0.019	0.053	0.051	16.5	0.55	1.1
Gironde Estuary sample G1s	1 kDa retentate	0.069	0.016	0.031	0.028	11.8	0.59	1.15
Gironde Estuary sample G1s	500 Da retentate	0.195	0.032	0.095	0.079	13.8	0.63	1.22
Gironde Estuary sample G1s	500 Da permeate	0.047	0.006	0.032	0.021	9.3	0.84	1.36
Gironde Estuary sample G2s	Bulk sample	0.805	0.106	0.36	0.329	14.6	0.61	1.2
Gironde Estuary sample G2s	3 kDa retentate	0.109	0.014	0.046	0.046	20.8	0.53	1.13
Gironde Estuary sample G2s	1 kDa retentate	0.077	0.006	0.033	0.031	18.7	0.59	1.19
Gironde Estuary sample G2s	500 Da retentate	0.282	0.025	0.124	0.122	22.4	0.59	1.19
Gironde Estuary sample G2s	500 Da permeate	0.067	0.037	0.041	0.026	5.4	0.95	1.37
Gironde Estuary sample G3s	Bulk sample	0.769	0.101	0.338	0.303	15.2	0.64	1.17
Gironde Estuary sample G3s	3 kDa retentate	0.091	0.011	0.039	0.036	16.8	0.61	1.16
Gironde Estuary sample G3s	1 kDa retentate	0.082	0.013	0.035	0.032	15.7	0.6	1.15
Gironde Estuary sample G3s	500 Da retentate	0.286	0.038	0.115	0.113	9.5	0.58	1.11
Gironde Estuary sample G3s	500 Da permeate	0.121	0.062	0.065	0.042	5.3	0.84	1.33
Gironde Estuary sample G4s	Bulk sample	0.048	0.035	0.021	0.015	2.6	0.92	1.21
Gironde Estuary sample G4s	3 kDa retentate	0.004	0.007	0.002	0.002	1.8	0.89	1.25
Gironde Estuary sample G4s	1 kDa retentate	0.007	0.009	0.003	0.002	1.9	0.86	1.21
Gironde Estuary sample G4s	500 Da retentate	0.015	0.008	0.008	0.005	2.2	0.74	1.15
Gironde Estuary sample G4s	500 Da permeate	0.022	0.019	0.015	0.008	1.4	0.88	1.22
FI calculated using McKnight 2001
HIX calculated using Zsolnay approach
BIX calculated as I380/I430
Appendix DOC content (µmol l-1) in UF fractions of water samples from Gironde (GIMET 3, June 2001) and Seine (NUTS 01, August 2001) Estuaries. HIX, BIX and f450/f500 values are also reported. The ana- lytical uncertainty in the concentration of DOC is < 4 µmol l-1.
Sample	Fraction	DOC (µM)	HIX	BIX	f450/ f500
Seine Estuary sample S1s	Bulk sample	233	7.2	0.7	1.25
Seine Estuary sample S1s	3 kDa retentate	110	10.4	0.56	1.23
Seine Estuary sample S1s	1 kDa retentate	52	10.4	0.63	1.2
Seine Estuary sample S1s	500 Da retentate	27	3.2	0.7	1.42
Seine Estuary sample S1s	500 Da permeate	34	3.2	0.9	1.61
Seine Estuary sample S2s	Bulk sample	229	7.1		1.25
Seine Estuary sample S2s	3 kDa retentate	77	10.9	0.59	1.19
Seine Estuary sample S2s	1 kDa retentate	42	13.5	0.65	1.19
Seine Estuary sample S2s	500 Da retentate	36	10.1	0.77	1.3
Seine Estuary sample S2s	500 Da permeate	36	6.3	0.87	1.51
Seine Estuary sample S2d	Bulk sample	250	7.4	0.69	1.26
Seine Estuary sample S2d	3 kDa retentate	86	11	0.57	1.17
Seine Estuary sample S2d	1 kDa retentate	62	11.7	0.66	1.18
Seine Estuary sample S2d	500 Da retentate	51	7.4	0.73	1.28
Seine Estuary sample S2d	500 Da permeate	37	3.2	1.02	1.57
Seine Estuary sample S3s	Bulk sample	192	7.5	0.7	1.28
Seine Estuary sample S3s	3 kDa retentate	73	11.4	0.59	1.19
Seine Estuary sample S3s	1 kDa retentate	46	17.3	0.62	1.17
Seine Estuary sample S3s	500 Da retentate	40	12.1	0.76	1.28
Seine Estuary sample S3s	500 Da permeate	30	5.4	0.84	1.42
Seine Estuary sample S4s	Bulk sample	213	7.7	0.72	1.24
Seine Estuary sample S4s	3 kDa retentate	70	13.3	0.6	1.2
Seine Estuary sample S4s	1 kDa retentate	47	14.5	0.61	1.18
Seine Estuary sample S4s	500 Da retentate	41	12.9	0.72	1.28
Seine Estuary sample S4s	500 Da permeate	31	4.5	0.81	1.46
Seine Estuary sample S4d	Bulk sample	554	7.7	0.71	1.25
Seine Estuary sample S4d	3 kDa retentate	146	12	0.63	1.2
Seine Estuary sample S4d	1 kDa retentate	120	8.3	0.59	1.17
Seine Estuary sample S4d	500 Da retentate	103	4	0.7	1.31
Seine Estuary sample S4d	500 Da permeate	109	3.4	0.86	1.44
Seine Estuary sample S5s	Bulk sample	167	7.7	0.72	1.23
Seine Estuary sample S5s	3 kDa retentate	42	13.6	0.63	1.18
Seine Estuary sample S5s	1 kDa retentate	29	10.4	0.62	1.17
Seine Estuary sample S5s	500 Da retentate	51	2.5	0.7	1.27
Seine Estuary sample S5s	500 Da permeate	25	5.5	0.89	1.35
Seine Estuary sample S5d	Bulk sample	196	7.7	0.73	1.22
Seine Estuary sample S5d	3 kDa retentate	43	10.9	0.65	1.18
Seine Estuary sample S5d	1 kDa retentate	39	6.9	0.62	1.18
Seine Estuary sample S5d	500 Da retentate	63	1.7	0.69	1.29
Seine Estuary sample S5d	500 Da permeate	33	5.2	0.92	1.36
Seine Estuary sample S6s	Bulk sample	133	7.7	0.83	1.26
Seine Estuary sample S6s	3 kDa retentate	29	13.3	0.71	1.16
Seine Estuary sample S6s	1 kDa retentate	16	14.5	0.7	1.14
Seine Estuary sample S6s	500 Da retentate	50	12.9	0.71	1.37
Seine Estuary sample S6s	500 Da permeate	25	4.5	0.96	1.28
Seine Estuary sample S6d	Bulk sample	171	5.1	0.8	1.21
Seine Estuary sample S6d	3 kDa retentate	37	5.6	0.76	1.17
Seine Estuary sample S6d	1 kDa retentate	34	2.4	0.64	1.16
Seine Estuary sample S6d	500 Da retentate	55	1.7	0.74	1.26
Seine Estuary sample S6d	500 Da permeate	34	4	0.92	1.14
Gironde Estuary sample G1s	Bulk sample	167	10	0.63	1.18
Gironde Estuary sample G1s	3 kDa retentate	55	11.1	0.55	1.12
Gironde Estuary sample G1s	1 kDa retentate	27	12.1	0.57	1.16
Gironde Estuary sample G1s	500 Da retentate	10	12.3	0.65	1.24
Gironde Estuary sample G1s	500 Da permeate	60	9.9	0.81	1.29
Gironde Estuary sample G1md	Bulk sample	171	10.7	0.62	1.16
Gironde Estuary sample G1md	3 kDa retentate	n.d.	20.3	0.47	1.11
Gironde Estuary sample G1md	1 kDa retentate	n.d.	22.9	0.59	1.16
Gironde Estuary sample G1md	500 Da retentate	n.d.	12.3	0.68	1.29
Gironde Estuary sample G1md	500 Da permeate	n.d.	12.8	0.8	1.38
Gironde Estuary sample G1d	Bulk sample	196	11.2	0.61	1.17
Gironde Estuary sample G1d	3 kDa retentate	62	9	0.57	1.16
Gironde Estuary sample G1d	1 kDa retentate	23	9.1	0.59	1.18
Gironde Estuary sample G1d	500 Da retentate	16	7.8	0.63	1.26
Gironde Estuary sample G1d	500 Da permeate	74	7.1	0.8	1.45
Gironde Estuary sample G2s	Bulk sample	221	15.8	0.61	1.17
Gironde Estuary sample G2s	3 kDa retentate	69	28	0.57	1.13
Gironde Estuary sample G2s	1 kDa retentate	33	13.6	0.57	1.16
Gironde Estuary sample G2s	500 Da retentate	35	10.9	0.66	1.29
Gironde Estuary sample G2s	500 Da permeate	64	9.7	0.84	1.35
Gironde Estuary sample G2md	Bulk sample	300	10.9	0.62	1.16
Gironde Estuary sample G2md	3 kDa retentate	n.d.	17.9	0.55	1.09
Gironde Estuary sample G2md	1 kDa retentate	n.d.	9.2	0.6	1.15
Gironde Estuary sample G2md	500 Da retentate	n.d.	8.6	0.69	1.27
Gironde Estuary sample G2md	500 Da permeate	n.d.	5.2	0.77	1.25
Gironde Estuary sample G1md	Bulk sample	542	15.8	0.6	1.17
Gironde Estuary sample G1md	3 kDa retentate	210	28	0.56	1.12
Gironde Estuary sample G1md	1 kDa retentate	75	9.4	0.57	1.17
Gironde Estuary sample G1md	500 Da retentate	51	10.9	0.63	1.27
Gironde Estuary sample G1md	500 Da permeate	155	8.6	0.78	1.38
Gironde Estuary sample G3s	Bulk sample	175	10.1	0.65	1.15
Gironde Estuary sample G3s	3 kDa retentate	41	12.8	0.63	1.1
Gironde Estuary sample G3s	1 kDa retentate	24	9.2	0.58	1.15
Gironde Estuary sample G3s	500 Da retentate	15	4.8	0.64	1.3
Gironde Estuary sample G3s	500 Da permeate	60	5.7	0.79	1.34
Gironde Estuary sample G3md	Bulk sample	171	9.5	0.65	1.16
Gironde Estuary sample G3md	3 kDa retentate	n.d.	9.2	0.62	1.04
Gironde Estuary sample G3md	1 kDa retentate	n.d.	11.1	0.59	1.09
Gironde Estuary sample G3md	500 Da retentate	n.d.	4.6	0.67	1.14
Gironde Estuary sample G3md	500 Da permeate	n.d.	5.4	0.78	1.15
Gironde Estuary sample G3d	Bulk sample	150	9.6	0.67	1.1
Gironde Estuary sample G3d	3 kDa retentate	44	5.3	0.63	1.13
Gironde Estuary sample G3d	1 kDa retentate	24	5.1	0.59	1.12
Gironde Estuary sample G3d	500 Da retentate	28	4.8	0.64	1.23
Gironde Estuary sample G3d	500 Da permeate	17	4.6	0.8	1.37

## Sheet: Hunt 2007
Hunt, J. F. & Ohno, T. Characterization of Fresh and Decomposed Dissolved Organic Matter Using Excitation−Emission Matrix Fluorescence Spectroscopy and Multiway Analysis. J. Agric. Food Chem. 55, 2121–2128 (2007).
Table 2. Selected Chemical Parameters of Fresh and Decomposed Field-Weathered and Legume Plant Residues and Animal Manuresa
Sample ID	Stage	DOC (mg/L)	Molar Absorptivity at 280 nm	MWAP	HIX
Alfalfa	Fresh	2360	94.9	632	1.98
Alfalfa	Decomposed	2050	113	2610	1.89
Canola	Fresh	1140	69	270	1.03
Canola	Decomposed	820	108	648	2.06
Crimson Clover	Fresh	3390	78.1	237	0.84
Crimson Clover	Decomposed	2330	103	353	0.78
Hairy Vetch	Fresh	2370	50.2	277	0.97
Hairy Vetch	Decomposed	1900	118	954	1.3
Lupin	Fresh	2130	45.2	240	0.93
Lupin	Decomposed	1150	86.2	408	1.51
Corn	Fresh	1710	88	595	1.55
Corn	Decomposed	1030	163	1640	2.24
Millet	Fresh	612	107	2170	1.25
Millet	Decomposed	370	198	6790	2.43
Oat	Fresh	721	117	1110	1.13
Oat	Decomposed	1260	63.7	2760	1.01
Soybean	Fresh	1160	65.7	690	1.36
Soybean	Decomposed	882	60	2700	1.46
Wheat	Fresh	1510	72.9	1490	1.89
Wheat	Decomposed	1040	92	2890	2.33
Dairy Manure	Fresh	424	376	6310	4.31
Dairy Manure	Decomposed	726	411	7240	5.52
Poultry Manure	Fresh	957	293	242	2.06
Poultry Manure	Decomposed	987	90.7	5500	3.21
Swine Manure	Fresh	1200	62.2	330	0.98
Swine Manure	Decomposed	662	111	3250	1.74

## Sheet: Hur 2011
Hur, J. Microbial Changes in Selected Operational Descriptors of Dissolved Organic Matters From Various Sources in a Watershed. Water Air and Soil Pollution {215}, {465-476} (2011).
Table 1 Selected operational descriptors of DOMs extracted from diverse sources
Group	Sources	FI	HIX (Zsolnay)	MW (Da)
Effluent DOM	Treated Sewage (TS)	2.35	4.4	638
Algal-derived DOM	Lake Algae (LA)	1.78	0.4	197
Algal-derived DOM	Attached algae (AA)	1.82	1.2	215
Terrestrial DOM	Paddy Soil	2.02	5.5	854
Terrestrial DOM	Field soil (FS)	1.87	9.5	1220
Terrestrial DOM	Lake sediment (SD)	1.8	3.7	829
Plant-derived DOM	Reed (RD)	1.45	1.5	752
Plant-derived DOM	Leaf litter (LT)	1.39	1.3	856
Plant-derived DOM	Weed (ED)	1.7	0.6	627

## Sheet: Kalbitz 2003
Kalbitz, K., Schmerwitz, J., Schwesig, D. & Matzner, E. Biodegradation of soil-derived dissolved organic matter as related to its properties. Geoderma 113, 273–291 (2003).
	Table 3 Properties of the DOM solutions before incubation
	DOM	A 280a	HIXsyn	HIXem	XAD-8	Aromatic	Carbohydrate
	solution	(L mgC 1 cm-1)	(–)	(–)	(%)	He (%)	Hf (%)
First group with a high biodegradation	Oi-beech	0.0162	0.58	4.7	24	6	37
	Oi-spruce	0.0156	0.35	2.4	29	6	40
	Oe-spruce	0.0065	0.66	1.4	21	6	44
	Maize straw	0.0064	0.31	0.7	22	5	34
Second group with an intermediate biodegradation	BL-0	0.0235	0.43	12.5	45	9	21
	BL-NPK	0.0291	0.47	19.1	55	n.d.	21
	BL-manure	0.037	0.64	20.9	46	12	24
Third group with a low biodegradation	Oa-beech	0.0309	0.75	14	77	11	24
	Oa-spruce	0.0413	2.39	16.3	73	13	31
	fen-1	0.028	0.63	11.4	48	9	29
	fen-2	0.0416	1.5	25.5	65	10	14
	fen-3	0.0417	1.24	23.7	67	12	17
	fen-4	0.0436	1.32	27.4	75	13	18
	n.d.: Spectrum was not interpretable in this region. a Specific absorbance at 280 nm. b Humification index using synchronous fluorescence spectra (band ratio of intensities: 460/345 nm) (Kalbitz and Geyer, 2001). c Humification index using emission fluorescence spectra (ratio of areas: 435 – 480 nm/300 – 345 nm) (Zsolnay et al., 1999). d % of DOC sorbed onto XAD-8 resin. e 1H-NMR, aromatic H (5.5…

[truncated: 15 more sheets: Keen 2014, Kellerman 2018, Maizel and Remucal, McKay 2018, McKnight 2001, Mostafa 2010, Nguyen 2010, Peurovia and Philaja 1997, Peurovia and Philaja 2004, Rosario-Ortiz 2008, Stewart Wetzel 1980, Shimabuku et al. 2017, Weishaar 2004, Wunsch 2017, Yacobi 2003]
